# Supplementary material for: STING enhances cell death through regulation of reactive oxygen species and DNA damage
Source: PubMed Central journal article supplement (PMC8055995; doi:10.1038/s41467-021-22572-8), 2021-04-19
Supplement: 41467_2021_22572_MOESM3_ESM.pdf [file 41467_2021_22572_MOESM3_ESM.pdf]

## **Description of Additional Supplementary Files**

File Name: Supplementary Data 1

Description: **List of Significantly Altered Genes after STING Knockout.**

File Name: Supplementary Data 2

Description: **Gene List and Associated Fold-changes for Genes in Figure 4b.**
